# Supplementary material for: 53BP1 and BRCA1 control pathway choice for stalled replication restart
Source: eLife journal article supplement (doi:10.7554/elife.30523), 2017-11-06
Supplement: supp [file elife-30523-supp-v1.zip]

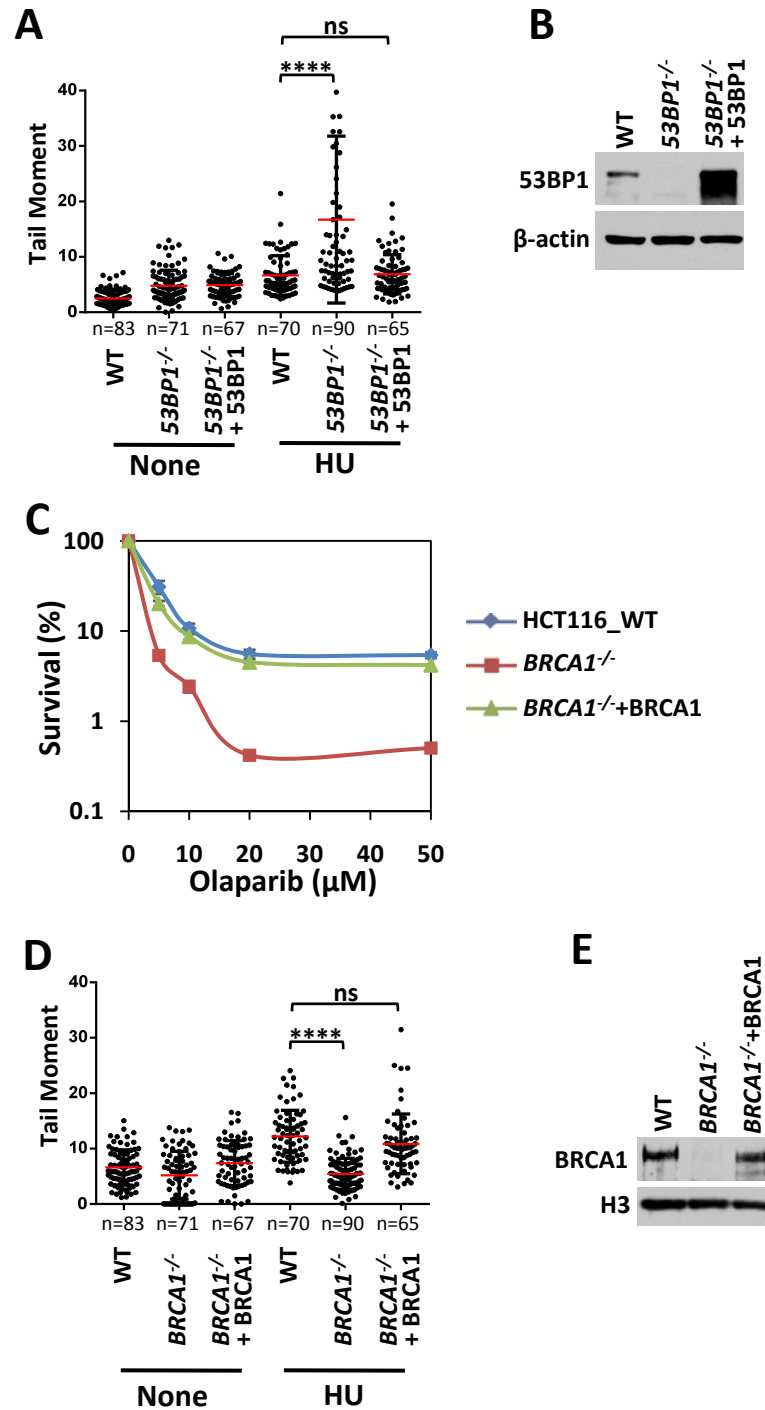

**Figure 4—figure supplement 1. Characterization of BRCA1 and 53BP1 knockout HCT116 cells.** (A, D) Comet assays measuring DSB accumulation in complemented 53BP1<sup>-/-</sup> (A) and BRCA1<sup>-/-</sup> (D) HCT116 cells. Cells treated with HU (2 mM) for 12 hr. The mean and s.d. are shown. \*\*\*\* P<0.0001, ns P>0.05. (B, E) immunoblots showing expression levels of 53BP1 (B) and BRCA1 (E). (C) Sensitivity assay of the BRCA1<sup>-/-</sup> and its complemented HCT116 cells. The mean and s.d. from three independent experiments are shown.
