# Supplementary material for: 53BP1 and BRCA1 control pathway choice for stalled replication restart
Source: eLife journal article supplement (doi:10.7554/elife.30523), 2017-11-06
Supplement: supp [file elife-30523-supp-v1.zip]

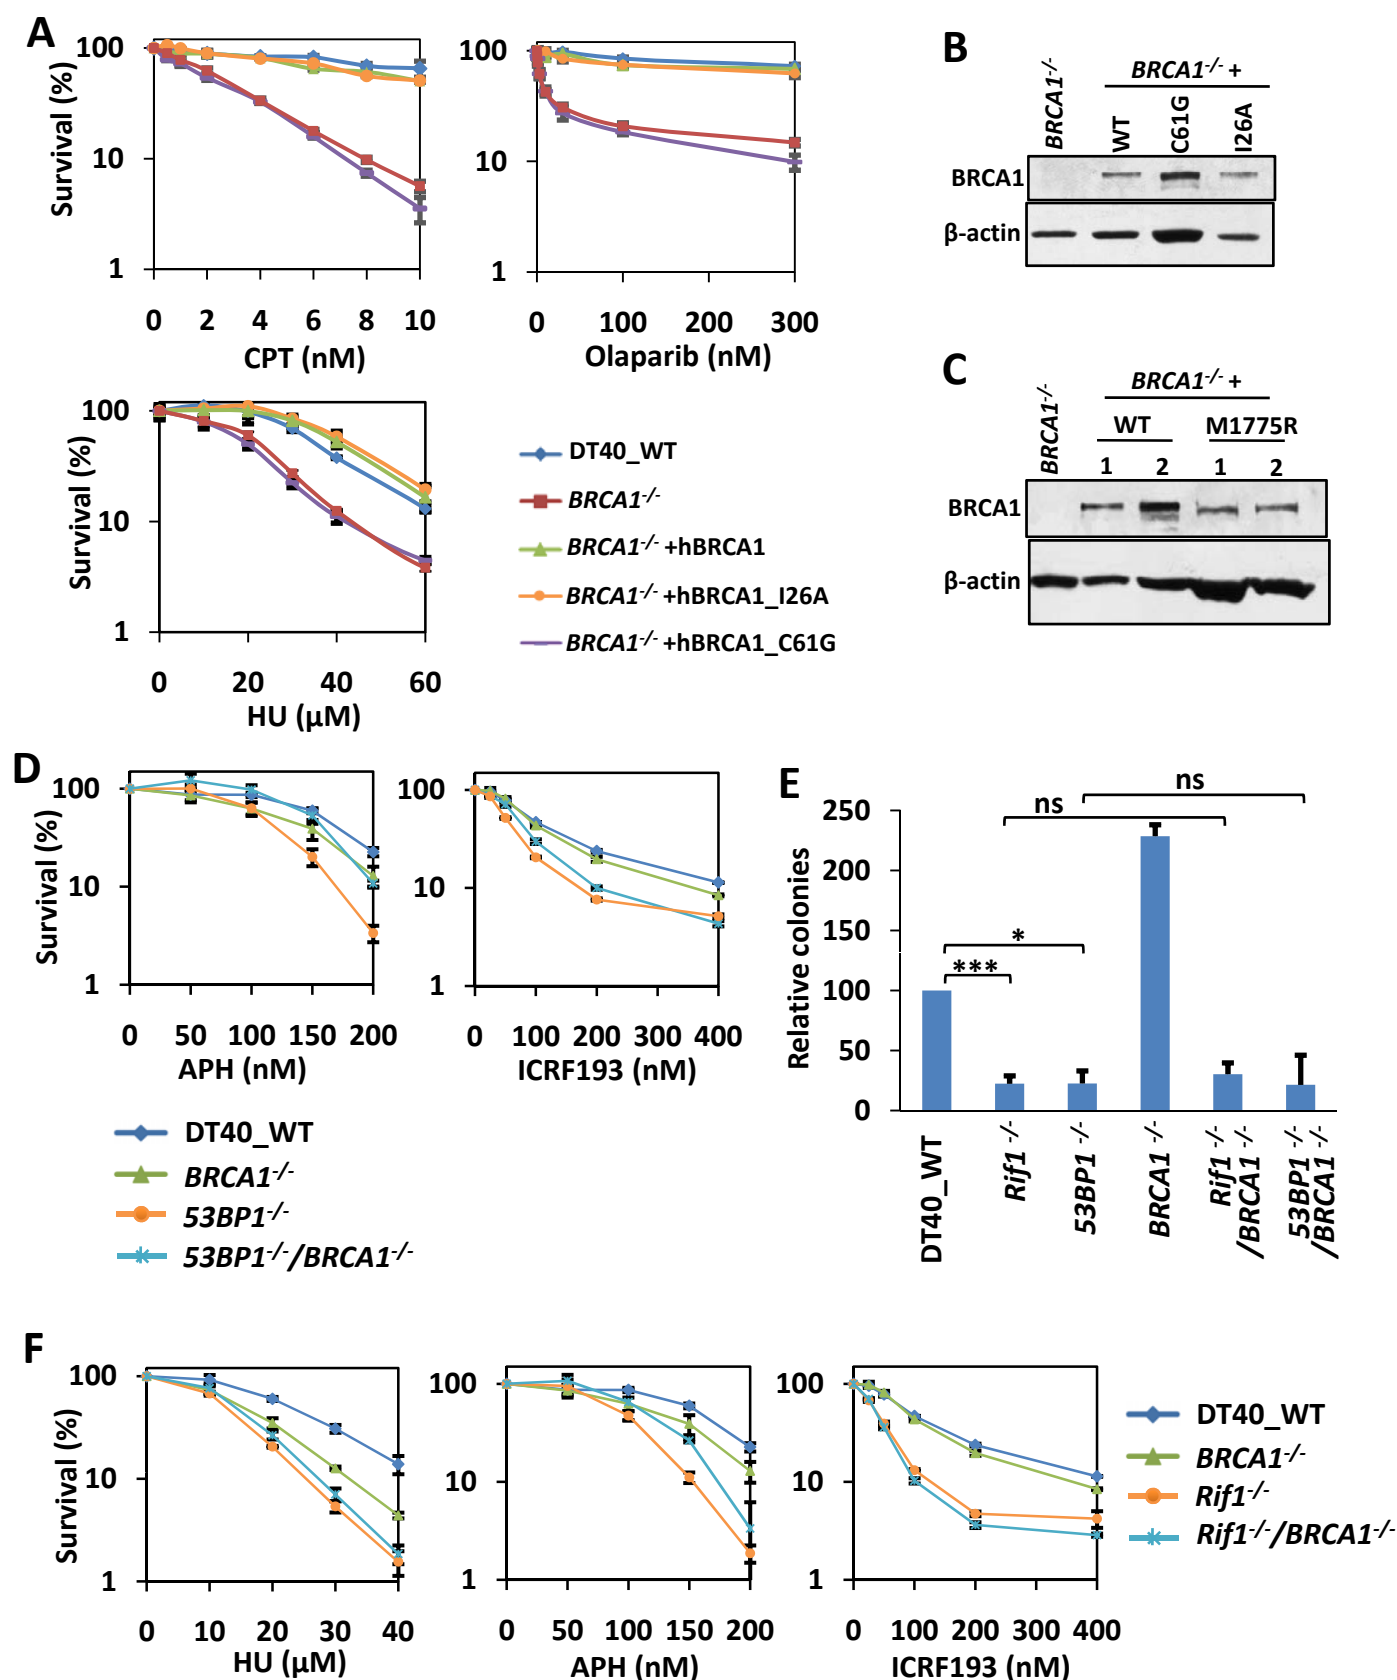

**Figure 2—figure supplement 1. BRCA1 and 53BP1 interact antagonistically to resist replication stress in a DSB repair-independent manner.** (A) Sensitivity assay of *BRCA1*<sup>-/-</sup> DT40 cells complemented with wild type or mutant human BRCA1 using MTT staining. (B-C) Western-blotting showing BRCA1 expression levels in the complemented *BRCA1*<sup>-/-</sup> cells. (D, F) Genetic interaction analysis between BRCA1 and 53BP1 (D) or RIF1 (F) by sensitivity assay using MTT staining. The mean and s.d. from three independent experiments are shown. (E) Genetic interaction analysis between BRCA1 and 53BP1 or RIF1 by random integration assay. The mean and s.d. from at least three independent experiments are shown. \*\*\*  $P < 0.001$ , \*  $P < 0.05$ , ns  $P > 0.05$ .
