# Supplementary material for: 53BP1 and BRCA1 control pathway choice for stalled replication restart
Source: eLife journal article supplement (doi:10.7554/elife.30523), 2017-11-06
Supplement: supp [file elife-30523-supp-v1.zip]

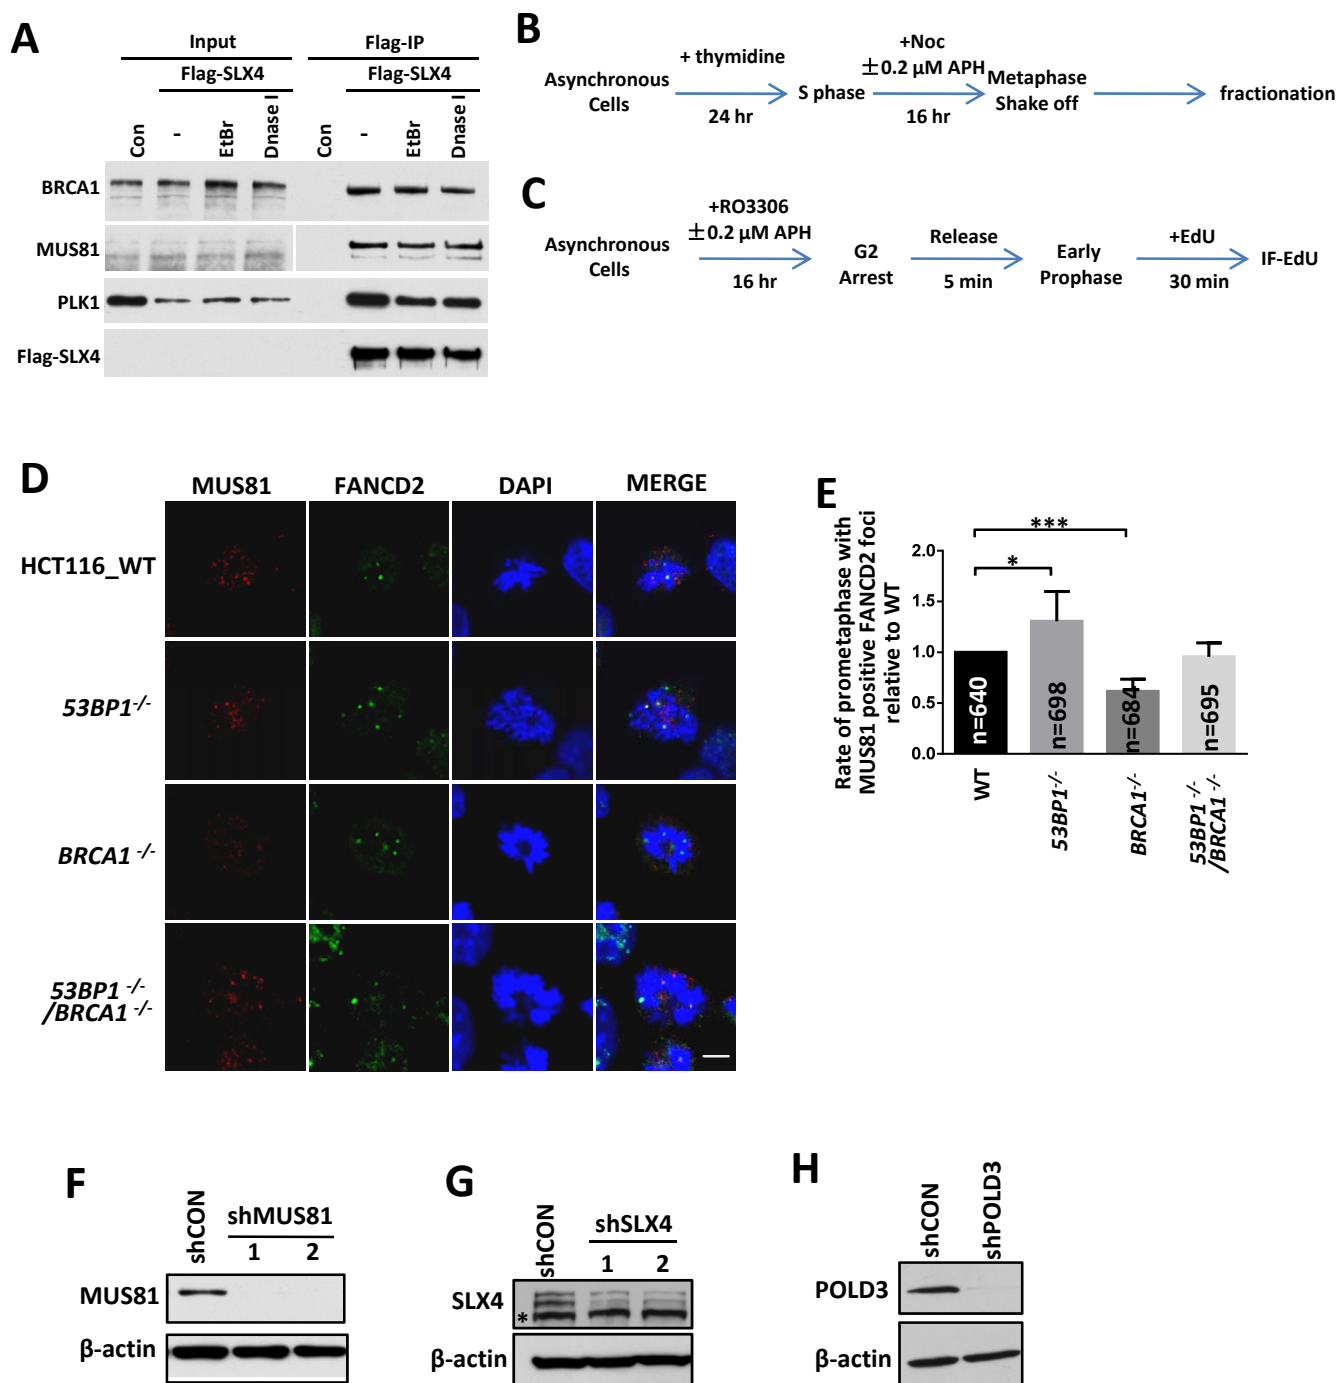

**Figure 5—figure supplement 1. BRCA1 promotes the recruitment of the SLX-MUS complex to stalled forks.** (A) Immunoblot showing the immunoprecipitation of Flag-tagged SLX4 in present of Ethidium Bromide (EtBr; 100  $\mu$ g/ml) or DnaseI (10 unit/ml). (B-C) experimental workflows for fractionation (B) and immunofluorescence (C). (D-E) Immunofluorescence (D) and its quantifications (E) showing colocalization of MUS81 and FANCD2 in condensed mitotic nuclei. Experiments were performed as the workflow in C. The mean and s.d. from four independent experiments are shown. Scale bar 2  $\mu$ m. \*\*\*  $P < 0.001$ , \*  $P < 0.05$ . (F-H) Western-blotting showing knockdown efficiency of MUS81 (F), SLX4 (G) and POLD3 (H) in HCT116. The asterisk marks a crossreactive polypeptide.
