# Supplementary material for: 53BP1 and BRCA1 control pathway choice for stalled replication restart
Source: eLife journal article supplement (doi:10.7554/elife.30523), 2017-11-06
Supplement: supp [file elife-30523-supp-v1.zip]

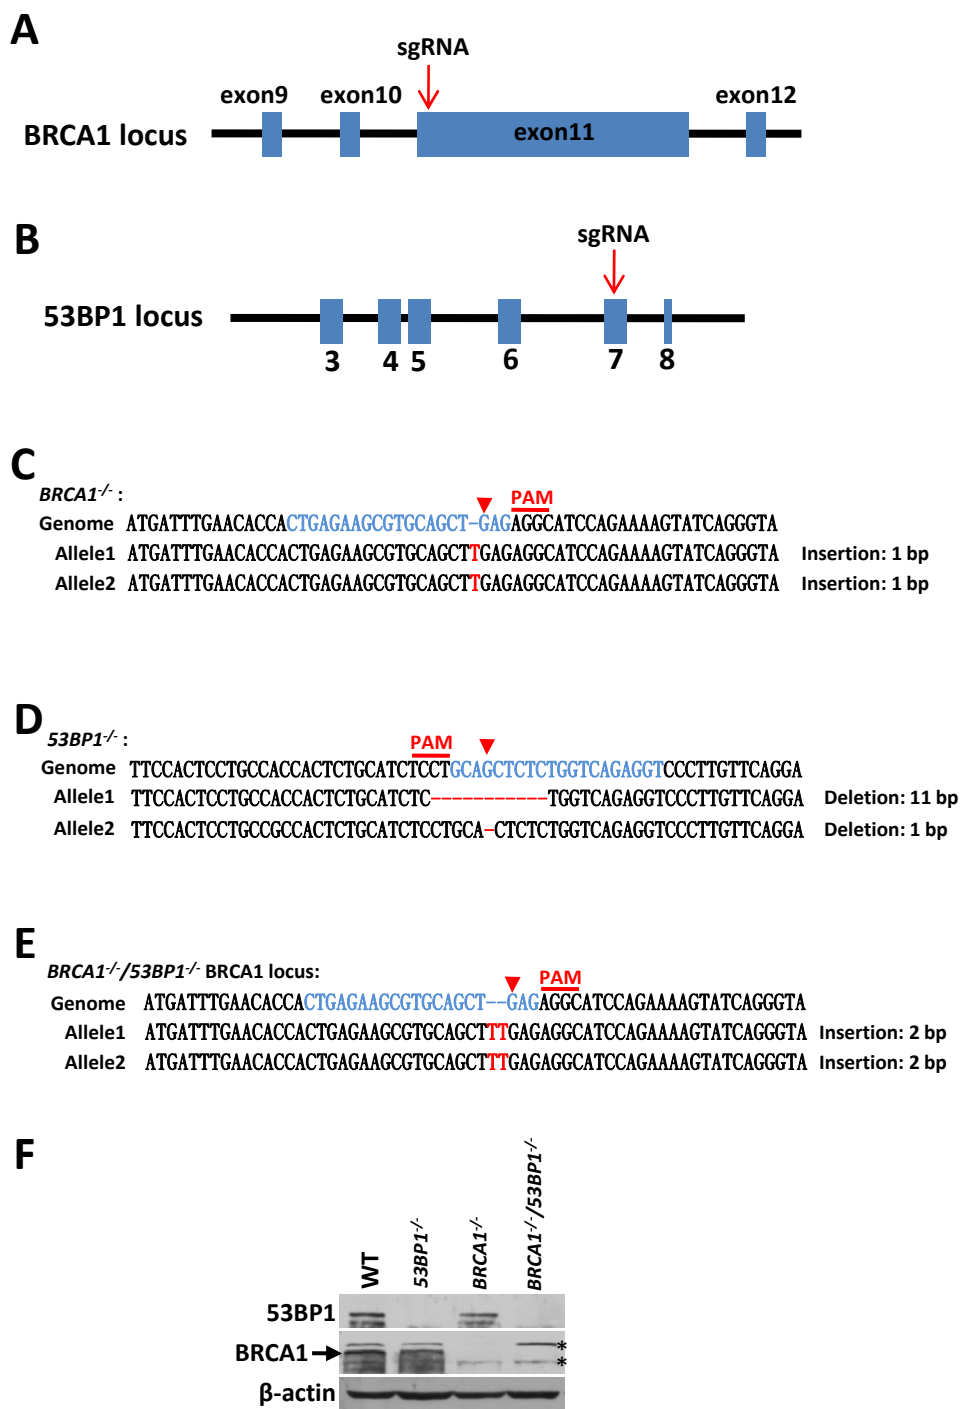

**Figure 2—figure supplement 2. Generation of BRCA1 and 53BP1 knockout HCT116 cells.** (A-B) schematics showing CRISPR sites of BRCA1 (A) and 53BP1 (B) gene. (C-E) Schematic representation of the generation of *BRCA1*<sup>-/-</sup> (C), *53BP1*<sup>-/-</sup> (D) and *BRCA1*<sup>-/-</sup> *53BP1*<sup>-/-</sup> (E) HCT116 cells. The *BRCA1*<sup>-/-</sup> *53BP1*<sup>-/-</sup> clone was generated by BRCA1 sgRNA in the *53BP1*<sup>-/-</sup> cells. The guide sequences are highlighted in blue. The PAM sequences are indicated by red lines. The red arrow indicates the putative cleavage site. The red dashes indicate the deleted bases. (F) Immunoblot showing the BRCA1 and 53BP1 protein levels in the wild-type, *BRCA1*<sup>-/-</sup>, *53BP1*<sup>-/-</sup> and *BRCA1*<sup>-/-</sup> *53BP1*<sup>-/-</sup> HCT116 cells. The asterisks mark crossreactive polypeptides.
