# Supplementary material for: 53BP1 and BRCA1 control pathway choice for stalled replication restart
Source: eLife journal article supplement (doi:10.7554/elife.30523), 2017-11-06
Supplement: supp [file elife-30523-supp-v1.zip]

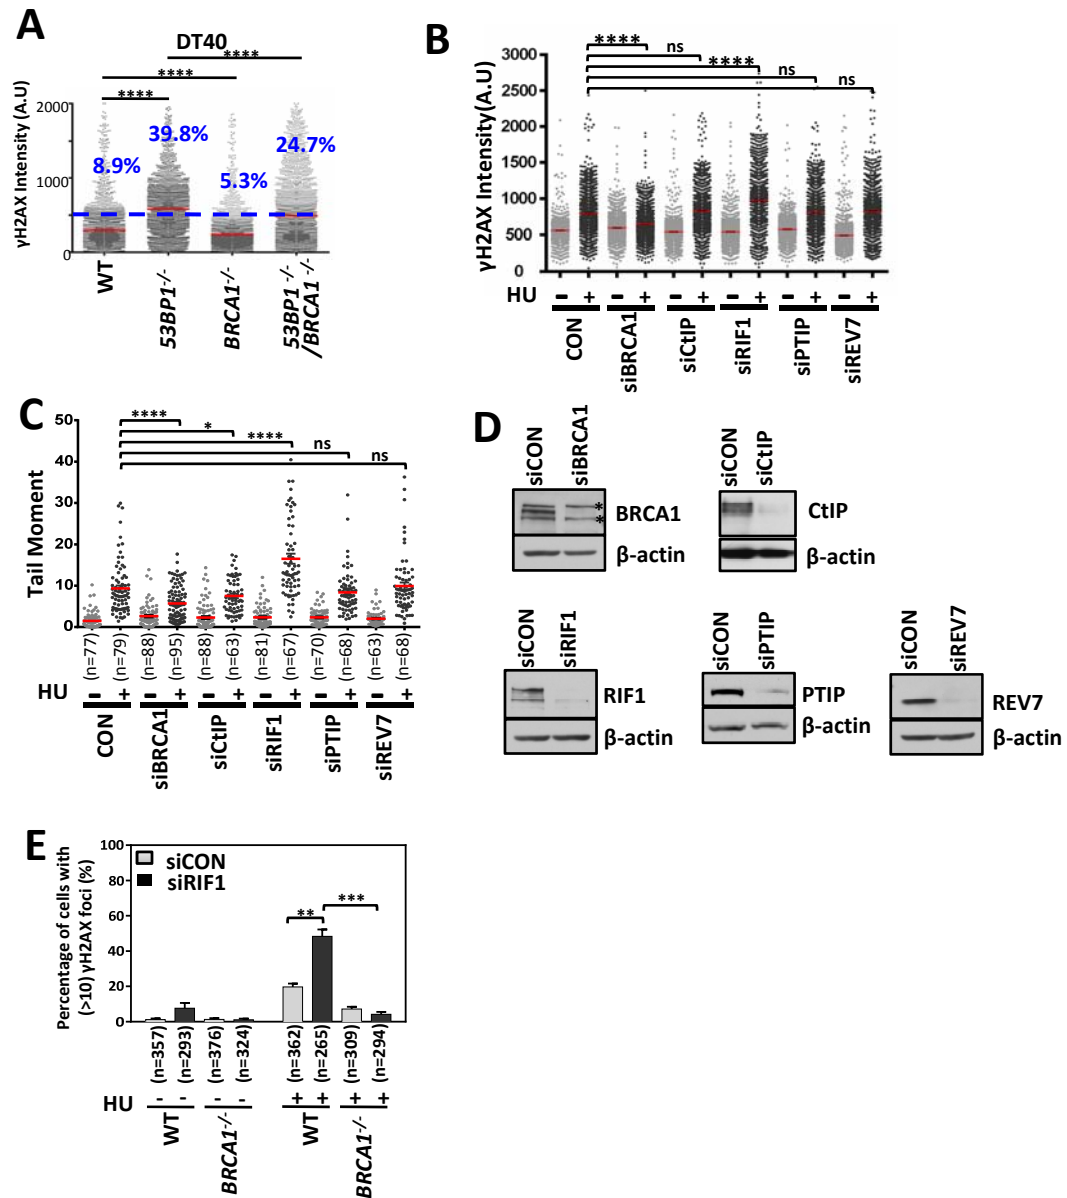

**Figure 4—figure supplement 2. 53BP1 and BRCA1 have opposite effects in inducing cleavage of replication forks.** (A) QIBC assay of immunolabeled DT40 cells. Cells were treated with 5 mM HU 5 hr before harvest. Blue dashed lines indicate the cutoff of γH2AX-positive cells. Percentages of γH2AX-positive cells were calculated. mean ± s.e.m (n=5000) are shown. (B-C) QIBC assay (B) and comet assay (C) of HeLa cells depleted with indicated proteins. Cells were treated with 2 mM HU for 3 hr (B) or 12 hr (C). mean ± s.e.m are shown. (D) Western-blotting showing knockdown efficiency of multiple siRNAs. The asterisks mark crossreactive polypeptides. (E) graphs showing the γH2AX foci formation in the RIF1-depleted cells. Cells were treated with 2 mM HU 3 hr before fixing. Data are means of at least three independent experiments. Error bars indicate s.d. \*\*\*\* P<0.0001, \*\*\* P<0.001, \*\* P<0.01, \* P<0.05, ns P>0.05.
