# Supplementary material for: 53BP1 and BRCA1 control pathway choice for stalled replication restart
Source: eLife journal article supplement (doi:10.7554/elife.30523), 2017-11-06
Supplement: supp [file elife-30523-supp-v1.zip]

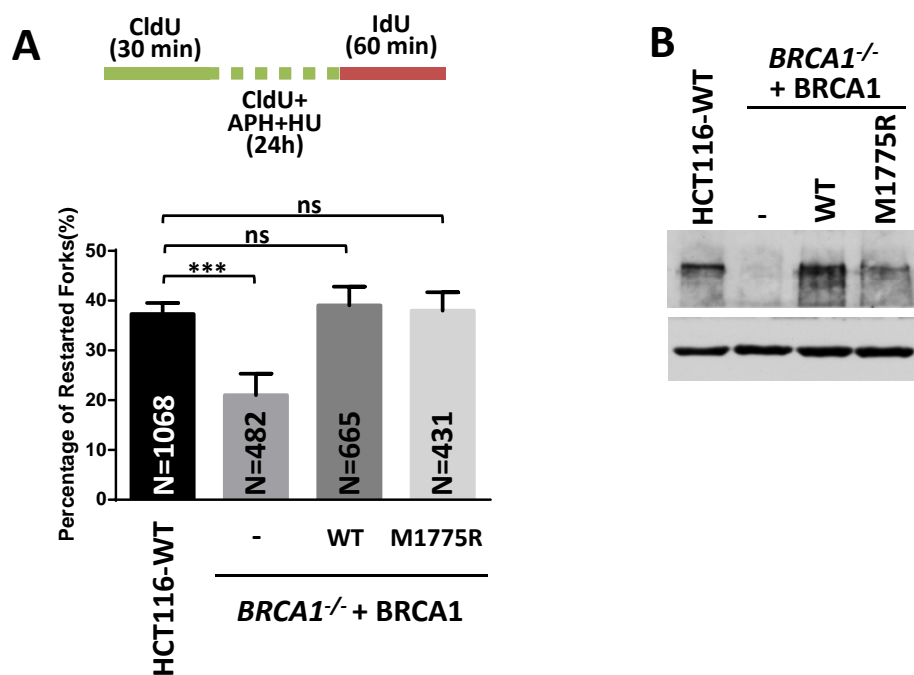

**Figure 3—figure supplement 1. BRCA1 M1775R retains its function in stalled fork restart.** (A) A graph showing stalled replication fork restart rates *BRCA1*<sup>-/-</sup> HCT116 cells expressing wild-type or M1775R BRCA1. The mean and s.d. from three independent experiments are shown. \*\*\* P<0.001, ns P>0.05. (B) immunoblots showing expression levels of BRCA1. (C) Sensitivity assay of the *BRCA1*<sup>-/-</sup> and its complemented HCT116 cells.
